# Supplementary material for: Inverse agonist of ERRγ controls influenza A virus and SARS-CoV-2 infections by targeting SREBP-1c-mediated fatty acid biosynthesis
Source: Research Square preprint supplement (doi:10.21203/rs.3.rs-6651542/v1), 2025-08-19
Supplement: Supplementary file 1 [file 5ee43289a1148686500e9635.docx]

**Supplementary Information**

**Inverse agonist of ERRγ controls influenza A virus and SARS-CoV-2 infections by targeting SREBP-1c-mediated fatty acid biosynthesis**

**Running title: ERRγ is a novel antiviral target**

**This PDF file includes:**

**Additional Materials and Methods**

**References**

**Supplementary Tables 1-18**

**Extended Data Figs. 1-9**

**Supplementary Materials and Methods**

**Cells and viruses**

The following cell lines were cultured according to the methods described previously.1 In brief, human lung carcinoma A549, human colorectal adenocarcinoma Caco-2 and HRT-18G, and African green monkey kidney epithelial MARC-145 were cultured in DMEM, African green monkey kidney epithelial Vero E6, canine kidney epithelial MDCK, and porcine kidney epithelial LLC-PK in EMEM, and African green monkey kidney epithelial MA104 in α-MEM. All the media were supplemented with 10% fetal bovine serum, 100 U/mL penicillin, and 100 μg/mL streptomycin. The details of these cell lines are in Supplementary Table 5.

We obtained and grew different strains of viruses, including one strain of IAV, three strains of SARS-CoV-2, one strain of BCoV, one strain of PEDV, one strain of PRRSV, one strain of RVA, and one strain of PSaV, as detailed in Supplementary Tables 6 and 7. The SARS-CoV-2 KCDC03, KDCA51463, and KDCA55905 strains were kindly provided by the Korea Disease Control and Prevention Agency (Cheongju, South Korea), PEDV QIAP1401 and PRRSV LMY strains from the Animal and Plant Quarantine Agency (Gimcheon, South Korea), and PSaV from Dr. K.O. Chang (Kansas State University).To promote viral growth, each corresponding medium was supplemented with specific substances: N-tosyl-L-phenylalanine chloromethyl ketone (TPCK)-treated trypsin for IAV and SARS-CoV-2, porcine pancreatin for BCoV, porcine pancreatic trypsin for PEDV, crystalized trypsin for BCoV, or glycochenodeoxycholic acid (GCDCA) for PSaV. Detailed information on these substances is in Supplementary Table 71.

To determine IAV titer, either plaque assay or cell culture immunofluorescence (CCIF) assay was used. The results were expressed as plaque-forming units per milliliter (PFU/mL) or fluorescence focus units per milliliter (FFU/mL)1. Titers of SARS-CoV-2 were measured using the 50% tissue infectious dose (TCID50) or CCIF assay, with a monoclonal antibody (Mab) specific for SARS-CoV-2 nucleocapsid (N) protein. The results were expressed as TCID50/ml and FFU/mL. BCoV, PEDV, RVA, PRRSV, and PSaV were determined by CCIF assay using Mabs specific for BCoV spike (S) protein, PEDV nucleoprotein (N), RVA VP6 protein, PRRSV matrix (M) protein, or PSaV VPg protein, and expressed as FFU/mL.

**Reagents, kits, siRNAs and antibodies**

Chemicals, kits, and siRNAs used in this study are listed in Supplementary Table 8. DN200434, kindly donated by NovMetaPharma (Seoul, South Korea), was dissolved in DMSO to prepare stock solutions for *in vitro* experiments. Porcine pancreatic trypsin, TPCK-treated trypsin, oseltamivir, GCDCA, 3-(4,5-dimethylthiazol-2-yl)-2,5-diphenyl tetrazolium bromide (MTT), Triton X-100, and BODIPY (493/503) purchased from Sigma Aldrich, pancreatin and crystalized trypsin from Gibco, and palmitic, oleic, linoleic acids and arachidonic acid from Sigma Aldrich were dissolved in PBS (pH 7.4) to prepare stock solutions.

In preparation for animal experiments, DN200434 was further dissolved in a mixture (vehicle) of 5% DMSO and 95% of 20% polyethylene glycol (PEG) 400 in saline (v/v) to be administered to mice infected with IAV and hamsters infected with SARS-CoV-2. Remdesivir was dissolved in a mixture of 10% DMSO and 90% corn oil (v/v), while oseltamivir was dissolved in water. To stain neutral lipids in lipid droplets in cells, BODIPY 493/503 from Sigma Aldrich was applied. For nuclear staining, Slow-Fade Gold antifade reagent with 4', 6-diamidino-2-phenylindole (DAPI) was obtained from Molecular Probes. Ultrapure agarose was purchased from Thermo Scientific for the plaque assay.

Kits used in this study included Bicinchoninic acid (BCA) protein assay and NE-PER™ Nuclear and Cytoplasmic Extraction Reagents from Thermo Scientific (Waltham, MA), SimpleChIP Plus Enzymatic Chromatin IP Kit from Cell Signaling, Luciferase Assay System from Promega, Triglyceride colorimetric assay and Cholesterol colorimetric assay kits from Abcam, CAPTUREomeTM S-palmitoylated protein kit from Badrilla, RNeasy mini kit from Qiagen, TOPscript™ cDNA synthesis kit from Enzynomics, Total ROS detection kit from Enzo Life Sciences, and IFN alpha, IFN beta, IL-6, TNF alpha, MCP-1, LTB4 and PGE2 ELISA kits from Thermo Scientific, and Fatty Acid Oxidation Assay kit from Assay Genie. siRNAs from Bioneer and Lipofectamine3000 from Thermo Scientific were used to silence the target gene.

As listed in Supplementary Table 9, various unconjugated monoclonal or polyclonal primary antibodies are used for each target protein or RNA: Mabs included ERRγ (R&D Systems), SARS-CoV-2 dsRNA (Scicons), SARS-CoV-2 nucleocapsid (N) protein (Prosci), IAV membrane (M2) protein (Abcam), IAV nucleoprotein (NP) (Abcam), GAPDH (Santa Cruz), β-actin (Thermo Scientific), BCoV spike (S) protein (Native Antigen Company), PEDV nucleoprotein (N) (Medgene Labs), RVA viral structural protein 6 (VP6) (Median Diagnostic), whereas Pabs were against the SREBP-1 (Abcam), SREBP-2 (Abcam), SARS-CoV-2 S protein (Prosci), IAV PB1 (Novus Biologicals), IAV hemagglutinin (HA) (Santa Cruz), IAV virion (Viasat), PRRSV matrix (M) protein (Bioss Antibodies), and PSaV viral genome-linked protein (VPg)2. Horseradish peroxidase (HRP)-conjugated secondary antibodies, including goat anti-rabbit IgG, rabbit anti-goat IgG, and goat anti-mouse IgG, were used for western blot and immunohistochemistry (IHC). Alexa Fluor (AF) 594-conjugated donkey anti-rabbit IgG, AF488-conjugated donkey anti-rabbit IgG, AF594-conjugated goat anti-mouse IgG, and AF488-conjugated goat anti-mouse IgG were utilized for IFA.

**Plasmids, transfection, and luciferase-based assay**

The plasmids encoding human *SREBP-1c* gene promoter fused to luciferase (*SREBP-1c-luc*), human *SREBP-1c* ERR-response element (ERRE) mutant (mut) gene promoter fused to luciferase (*SREBP-1c* ERREmut-luc), human *ESRRG* gene promoter fused to luciferase (*ERRγ*-luc), site-specific AP1 mutant human *ESRRG* gene promoter fused to luciferase (*ERRγ*-AP1mut-luc) and human *ESRRG* gene fused to flag-tag in pcDNA3.0 backbone (encoding Flag-ERRγ) were constructed as previously described.3-5 Target cells were seeded in 48-well plates and transfected with the above reporter plasmids using the transfection reagent LipofectamineTM 3000 (Thermo Scientific) according to the manufacturer’s procedure. Thereafter, the cells were mock-infected or infected with target viruses, treated with chemicals or vehicles for the indicated time points, and harvested at 24 hpi for luciferase and β-galactosidase assays. Luciferase activity was normalized to β-galactosidase activity, as previously discussed3-5.

**Cytotoxicity assessment**

As described previously, an MTT assay was used to assess each chemical's cytotoxicity6. Each chemical was serially 2-fold diluted with the vehicle and added to the maintenance medium of each cell monolayer. The MTT substrate was applied at a concentration of 0.3 μg/mL, and the absorbance was measured at an optical density (OD) of 570 nm. The half-maximal cytotoxic concentration (CC50) was determined using dose-response curves of cell cytotoxicity generated by GraphPad Prism software version 9.5.1.

**Treatment of cells with inhibitory chemicals and FFAs**

The above cell lines grown in 6- or 12-well plates or 8-well chamber slides with the desired confluency were washed twice with phosphate-buffered saline (PBS, pH 7.4). Thereafter, they were then mock-inoculated with medium only or inoculated with a virus at different multiplicities of infection (MOI): MOI of 1 or 0.1 FFU/cell of SARS-CoV-2, IAV, BCoV, PEDV, PRRSV, and PSaV. After absorbing each inoculum for 1 h, the cells were washed twice with PBS (pH 7.4).

Different concentrations of inhibitory chemicals were treated on the cells grown in 6- or 12-well plates or 8-well chamber slides with the desired confluency as described elsewhere1. Cells treated with DN200434 (1 μM, 10 μM, or 20 μM concentration) or vehicle-treated immediately after absorption of SARS-CoV-2, IAV, BCoV, PEDV, RVA, PRRSV, and PSaV at an MOI of 0.1 FFU were incubated for each indicated time, and each cell lysate and the supernatant were used for the different experiments as described in the main text. Cells treated with DN200434 after infections of IAV or SARS-CoV-2, as described above, were supplemented with PA, OA, LA, or AA at 100 µM concentration and left incubation for each incubation time. The cells were used to assess levels of intracellular TAGs, cholesterol, FFAs, glycerol, FAO, proinflammatory cytokines, as well as viral genome copy numbers and virus titers as described.

**The preparation of fatty acid methyl esters (FAMEs) and fatty acid trimethylsilyl (TMS) derivatives from the cells**

The fatty acids in the mock- and virus-infected cells (either SARS-CoV-2 or IAV), which were treated with vehicle or DN200434, were saponified, methylated, and extracted before determining their composition according to the protocol of modified chemical derivatization for GC-MS system7,8. The freeze-dried cells (12.0 mg) were boiled for 15 min at 90°C in 1.0 mL of 0.5 M KOH/MeOH solutions. The samples were treated with a methylation reagent consisting of BF3-MeOH (0.5 mL) and heated for 2.0 min at 90°C. After cooling to room temperature, saturated NaCl solution (1.5 mL) and *n*-hexane (1.0 mL) were added. The samples were centrifuged at 2000 rpm for 2.0 min, and the upper phase was collected. The organic phase of the samples (0.5mL) was treated with BSTFA (0.15 mL) at 80°C for 20 min. Then, the sample was transferred to a new GC vial.

**Gas chromatography-mass spectroscopy (GC-MS) analysis of FAMEs and fatty acid trimethylsilyl (TMS) derivatizations**

The composition of FFAs in the mock- and virus-infected cells (either SARS-CoV-2 or IAV), which were treated with vehicle or DN200434, was analyzed by GC-MS analysis of FMEs using a Shimadzu GC-2010 Plus gas chromatograph equipped with GC-MS mass detector. A DB-5 column, 30m X 0.25mm X 0.25 μm film thickness, was used (J & W Scientific, Santa Clara, Calif., U.S.A). Helium was the carrier gas with a column head pressure of 10 psi. The flow rate through the column was 0.68 ml/min. The injector was set at 200°C using the split injection mode with a ratio of 30:1, and 1 μL injections were made. The temperature gradient began at 160°C for 2.0 min, increased linearly to 320°C at 5.0°C/min, and held for 2.5 min. The source and quadrupole were maintained at temperatures of 230°C and 280°C, respectively. The detector was operated in scanning mode over the m/z range of 100-1500. The components were identified based on their linear retention indices, which were determined by comparing them with a series of alkanes, and their mass spectral fragmentation patterns, which were compared to those stored in the data bank (Wiley 9th and the NIST Mass Spectral Library).

**Heatmap cluster graphs**

According to GC-MS analysis, a heatmap was created using R software (version 4.3.1). The rows are mock- or virus-infected groups with either vehicle or DN200434 treatment, and the columns represent the target fatty acids described previously9. Large numerical values were represented by dark red squares and smaller values by dark blue squares. Hierarchical clustering in R generated dendrogram trees by permuting the columns of the heatmap to place similar values near each other. The matrix data can be rearranged automatically with different clustering methods. An R script was created to cluster data using correlation coefficients as a distance measure. Graphs generated by the default parameters of the R heatmap function are compared.

**Chromatin immunoprecipitation (ChIP) assay**

ChIP assay was carried out according to previous studies4,5. Briefly, Vero E6 or A549 cells were infected with SARS-CoV-2 (MOI of 0.1 FFU/cell) or IAV (MOI of 1 FFU/cell) and treated with DN200434. After incubation for each indicated time, collected cells were fixed with 4% paraformaldehyde (PFA) at 4 °C. Nuclei were prepared and chromatins were fragmentized using the serial solutions and enzymes offered by SimpleChIP Plus Enzymatic Chromatin IP Kit from Cell Signaling. Acquired soluble chromatins were immunoprecipitated with an anti-p-c-Jun antibody. After recovering DNA, qPCR was performed using primers encompassing the AP1-binding region on the human *ERRγ* gene promoter (5′-CTGTGGGGGGACCAAATCATGT-3′ and 5′- GGAGAGTGAAAAA CCCAC-3). The size of the amplified PCR product was 278 base pairs.

**Determination of fatty acid oxidation (FAO)**

As previously reported, FAO activity was measured by a colorimetric FAO assay kit (AssayGenie)10,11. A549 and Vero E6 cells were treated with vehicle or 20 µM of DN200434 after IAV and SARS-CoV-2 infection at 1 MOI and 0.1 MOI, respectively. After 24 h (IAV) and 36 h (SARS-CoV-2) of incubation, A549 and Vero E6 cells were washed and lysed, respectively. The oxidation level of octanoyl-CoA in the supernatant from collected samples was measured by colorimetric reaction read at 492 nm. The FAO level was determined after normalization of cell numbers performed by BCA assay.

**Experimental animals**

We used seven-week-old female wild-type (WT) C57BL/6J mice from Samtako (Osan, South Korea) and eleven-week-old female WT Golden Syrian hamsters from Janvier Labs (Saint-Berthevin, France) as described previously1,12. Seven-week-old female *Esrrg*+/– mice (B6.129P2*‐Esrrg*tm1Dgen/Mmnc) and seven-week-old female SREBP-1c KO mice were used to assess their resistance to viral infections13,14. The mice and hamsters were housed in standard cages and provided with food and water *ad libitum*. The mice were kept in a room with a 12-hour light and 12-hour dark cycle at 25°C and 40-55% humidity in a specific-pathogen-free facility. The hamsters were kept in a room with a 12-hour light and 12-hour dark cycle at a temperature of 22-24°C and 40-55% humidity in an animal biosafety level three facility. After 1 week of acclimatization, mice and hamsters were used for experiments as described below.

**Measurement of proinflammatory and eicosanoids cytokines in the cell culture supernatant and bronchoalveolar lavage fluid (BALF)**

Proinflammatory cytokines, including IFN-α, IFN-β, TNF-α, IL-6, and MCP-1, and eicosanoids, such as LTB4 and PGE2, were measured in the supernatant of IAV-infected A549 or SARS-CoV-2-infected Vero E6 cells or in bronchioalveolar lavage (BAL) fluid from IAV-challenged mice or SARS-CoV-2-challenged hamsters as described previously15. In brief, A549 and Vero E6 cells infected with IAV at the MOI of 1 and SARS-CoV-2 at the MOI of 0.1, respectively, were treated with vehicle or DN200434, and the supernatants were collected after the indicated incubation time. BAL fluid was collected from the tracheas of mice and hamsters by cannulation using an 18-gauge and 20-gauge catheter, respectively. In total, 0.4 mL and 2 mL of ice-cold sterile PBS (pH 7.4) were inoculated into mice and hamsters, respectively, and the supernatants were collected after spinning down at 1,000 x g for 5 min at 4°C. Afterward, each supernatant was used to detect IFN-α, IFN-β, TNF-α, IL-6, MCP-1, LTB4, and PGE2 using a sandwich ELISA kit from Thermo Scientific.

**Determination of median lethal dose (LD50) of mouse-adapted PR8 strain**

Mouse-adapted PR8 (H1N1) strain was achieved by previously described methods16,17. In brief, female 6-week-old BALB/c mice were inoculated intranasally with 50 μl of cell-passaged supernatant of IAV PR8 strain under appropriate anesthesia (Zoeltil/Xylazine). At four days post-infection (dpi), harvested lung samples were homogenized, and 50 μl of the centrifuged homogenate followed by syringe filtration (0.2 μm) was used as the inoculum for the next passage. After a total of nine passages, a single clone in the lung homogenate was selected by plaque purification in MDCK cells. The cloned virus was passaged once in the allantoic cavities of 12-day-old chicken eggs for 48 h at 37oC to prepare the virus stock.

The median lethal dose (LD50) of the mouse-adapted PR8 strain was determined as described previously18,19. Four groups of 12 mice were infected with 101 to 104 PFU of the PR8 strain, and survival rate and body weight were recorded daily for 15 days. The LD50 was calculated by generating dose-response curves in GraphPad Prism software version 9.5.1.

***In vivo* antiviral activity, lipid metabolism, and pathogenicity**

The antiviral effects of DN200434 against IAV infection in the mouse model were examined with five groups of 16 mice, which were mock-challenged or challenged once by intranasal inoculation of 103 PFU of mouse-adapted PR8 strain in 50 μL PBS, respectively, and administered intraperitoneally with DN200434 in 50 μL vehicle [5% DMSO + 95% of 20% PEG 400 in saline (v/v)] containing 10, 20 or 40 mg kg-1 d-1 twice daily (Bid) with a 12 h interval for four consecutive days, respectively (Supplementary Table 10). The animals in each group were monitored daily by checking body weight, clinical signs, and survival for 15 days.

The antiviral effects of DN200434 against SARS-CoV-2 infection in the hamster model were tested with four groups of 5 hamsters, which were mock-challenged or challenged once by intranasal inoculation of 103 PFU of mouse-adapted PR8 strain in 50 μL PBS, respectively and administered intraperitoneally with DN200434 in 50 μL vehicle [5% DMSO + 95% of 20% PEG 400 in saline (v/v)] containing 10, 20 or 40 mg kg-1 d-1 twice daily (Bid) with a 12 h interval for four consecutive days, respectively (Supplementary Table 11). The animals in each group were monitored daily by checking body weight and survival for five days. Whole lung tissues were sampled from surviving and dead hamsters in each group at five dpi, and the gross lung lesion surface was measured using NIH ImageJ software.

The synergistic anti-IAV effects of DN200434 with oseltamivir were investigated with five groups of 16 anesthetized mice, which were challenged once by intranasal inoculation of 103 PFU of mouse-adapted PR8 strain in 50 μL PBS and administered with vehicle or DN200434 in 50 μL vehicle by intraperitoneal injection or oseltamivir in 50 μL vehicle by oral gavage (19 gage) as indicated in Supplementary Table 12. The effects of the combination therapy of DN200434 with remdesivir on the infection of three SARS-CoV-2 strains, KCDC03, KDCA51463, and KDCA55905, were studied in the hamster model (Supplementary Tables 13-15). In each trial, a group of 5 anesthetized hamsters was administered intraperitoneally with the vehicle, DN200434, or remdesivir after being challenged once with intratracheal inoculation of PBS or 105 TCID50 with one of the SARS-CoV-2 strains. The body weight and survival of the experimental animals were monitored daily for five days. At five days post-infection, lung tissues were collected from both surviving and deceased hamsters in each group, and the surface area of lung lesions was measured using the aforementioned method.

The levels of viral protein and genomic copy numbers, changes of host gene mRNA levels, TAG level, and histopathological changes in lung tissues were tested with 4 groups of five 8-week-old female WT C57BL/6J anesthetized mice; the animals were first infected with intranasal inoculation of PBS or 103 PFU of mouse-adapted IAV PR8 strain and then administered with either vehicle or DN200434 as described in Supplementary Table 16. The above viral and host changes were also examined in the SARS-CoV-2 experiments; 4 groups of five 12-week-old female WT anesthetized hamsters were challenged with intratracheal inoculation of PBS or 105 TCID50 of SARS-CoV-2 KCDC03 strain and then administered with vehicle or DN200434 as described in Supplementary Table 17.

At the necropsy of the mice and hamster, lung tissues were prepared for further analysis. The left cranial lobe was cut in half and fixed in 10% neutral formalin for histopathology and in 4% PFA for cryosection. The left remaining lobes were mixed, thoroughly minced, and homogenized using a Precellys 23 tissue homogenizer (Bertin Technologies, France). After centrifugation at 4 °C, the cleared supernatants were prepared in separate buffers or reagents according to the manufacturer’s instruction or previous methods1; TAG quantification by TAG colorimetric assay, determination of infectious virus titer, viral and cellular target protein expression levels, or viral genome and cellular mRNA expression levels.

**Plaque assay**

The inhibitor effects on the infectivity of IAV after chemical treatment or siRNA transfection were determined by plaque assay, as previously reported18,20. In Brier, serial 10-fold dilutions of test supernatants prepared in DMEM were inoculated into each well of 24-well plates with confluent MDCK cells. After 1 h adsorption at 37 °C, each well was washed three times with DMEM, replaced with 4 mL of agar overlay medium containing 1 x DMEM, 1 μg/mL of TPCK-treated trypsin and 0.5% ultrapure agarose (Thermo Scientific), and cultured for 3 days at 37°C. After fixation with 4% buffered PFA for 10 min and removal of the agar overlay medium on the top, the cells were rinsed with PBS and stained with 0.1 mg/mL crystal violet for 30 min at 20°C. The plaque numbers were counted using the end-point dilution method. Afterward, the 50% inhibitory concentration (IC50) and selectivity index were calculated using GraphPad Prism software version 9.5.1.

**Median Tissue culture infectious dose (TCID50) assay**

The titer of SARS-CoV-2 in the samples was evaluated by a TCID50 assay as described elsewhere2. In brief, Vero E6 cells in 96-well plates were inoculated with ten-fold serial dilutions of the test samples for 1 h and replaced with DMEM supplemented with 1 μg/ml TPCK-treated trypsin. After incubation for 4 days at 37 °C, virus titers were determined by the method of Reed and Muench19.

**Immunofluorescence assay (IFA)**

In multiple *in vitro* experiments, IFA was performed to characterize cellular or viral protein expression under chemical treatment or siRNA transfection, as described above21-23. Each permissive cell line was prepared in an 8-well chamber slide, transfected with specific siRNA or scrambled siRNA, infected with or without a target virus, and treated with the DN200434 or vehicle. After incubation for the indicated time, the cells were fixed with 4% PFA for 10 min at 20 °C and permeabilized with 0.2% Triton X-100 for 10 min at 20 °C. Antibodies against each target protein or dsRNA prepared in PBS (pH 7.4) with 5% BSA were applied overnight at 4 °C. Afterward, each secondary antibody conjugated with AF488, AF594, or AF647 was incubated for 1-2 h at 20 °C. Additionally, 10 μM BODIPY 493/503 was applied for 10 min at 20 °C for LD staining. SlowFade Gold antifade reagent containing 1 × DAPI solution (Molecular Probes) was used for nucleus staining. The slides were observed with an LSM 900 confocal microscope using Zen Blue Software 2.6 (Carl Zeiss; Jena, Germany).

To evaluate the target virus titer in the samples under various conditions, such as applying chemical, siRNA, or gene KO, pre-cleared supernatants from cells or tissue homogenates were prepared in 10-fold serial dilution with virus growth medium. The diluted samples were transferred into each permissive cell line grown in 96-well plates for 1 h. After virus absorption, the cells were replaced with a new virus grow medium and further incubated until the designated time point at 37 °C in a CO2 incubator. Afterward, the cells were fixed with 4% PFA and permeabilized with 0. 2% Triton-X 100. The primary antibodies against IAV M2, SARS-CoV-2 N, BCoV S, PEDV N, RVA VP6, PRRSV M, and PSaV VPg proteins were used for each corresponding cell. Then, AF488-conjugated secondary antibodies compatible with the primary antibody were applied for 1-2 h at 20 °C. After washing and mounting with 60% glycerol, the plate was observed by inverted fluorescence microscopy. The endpoint dilution method counted the number of cells containing a positive signal for a viral antigen. A dose-response curve was generated to determine IC50 and SI using GraphPad Prism software version 9.5.1.

In multiple *in vivo* experiments, 4% PFA-fixed lung tissues acquired from mice and hamsters were used for IFAs, as previously described1. Three-micrometer cryosection on a slide with adhesive coating was supplied with primary antibodies and incubated at 4°C overnight. Afterward, AF488, AF594, or AF647-conjugated secondary antibodies were incubated for 1-2 h at 20 °C. After washing with PBS (pH 7.4), the slide was mounted with SlowFade Gold antifade reagent containing 1 × DAPI solution and observed by an LSM 900 confocal microscope using LSM software, Zen Blue Software 2.6 (Carl Zeiss).

The quantification of images such as positive signals or LDs was performed as described previously1,20. Briefly, each image was exchanged with the numerical value of pixels by Adobe Photoshop CS6, and calculations were made based on the size and number of pixels present in a snapshot. The average number or size of pixels of a positive signal in virus-infected groups was normalized to those of the mock-treated, mock-infected control and presented as relative values.

**Western blot analysis**

Western blot analysis was performed to evaluate the expression levels of the target protein from *in vitro* and *in vivo* experiments as described elsewhere2,23. In addition, to determine the distribution of ERRγ, SREBP-1, and SREBP-2 in the cytoplasm or nucleus, each individual cytoplasmic and nuclear fractions and lysates from cells or lung tissues was prepared with RIPA buffer containing 10 mM Tris/HCl (pH 7.4), 100 mM NaCl, 1 mM ethylenediaminetetraacetic acid (EDTA), 1 mM ethylene glycol-bis(2-aminoethylether)-N, N, N’, N’-tetraacetic acid (EGTA), 1 mM NaF, 20 mM Na2P2O7, 2 mM Na3VO4, 1% Triton X-100, 10% glycerol, 0.1% sodium dodecyl sulfate (SDS), and 0.5% deoxycholate (Invitrogen) on ice. After centrifugation at 12,000 × g for 10 min at 4 °C, total protein contents in the cleared supernatant were determined by a BCA protein assay kit (Thermo Scientific). The separation of normalized protein samples in SDS-polyacrylamide gel was done by electrophoretic procedures at 90 mA/gel. Subsequently, the proteins were transferred onto nitrocellulose membranes (GE Healthcare Life Sciences) at 150 mA/blot. The membrane with transferred proteins was treated for 1 h at 20°C with Tris-buffered saline containing 5% skimmed milk and 0.1% Tween-20 and then with primary antibody against each target protein by incubation overnight at 4°C on a shaker. After incubation with horseradish peroxidase (HRP)-conjugated secondary antibody for 1 h at 20°C, the ECL detection reagent (Dogen, Seoul, South Korea) developed target proteins. The visualization was performed by a Davinch-K Imaging System (Youngwha Scientific, Seoul, South Korea). The expression level of each target protein was normalized to an internal control such as the β-actin or GAPDH, and relative expression values were calculated individually in three independent experiments and presented as a mean-fold change

**Triglyceride colorimetric assay**

The level of TAG in the cells or tissue was measured by a TAG colorimetric kit (Cayman Chemicals), as previously described24. For the *in vitro* experiment, 5x106 cells were mixed with 500 μL of 1 × Standard Diluent and homogenized by sonication (VCX130, SONICS, Newtown, CT, USA) on ice under optimally operational conditions; 1/10 seconds (burst/break) for 20 cycles. After centrifugation, the acquired supernatants were diluted with 1 × Standard Diluent at a ratio of 1:2 according to the manufacturer’s recommendations. For the *in vivo* experiment, 100 mg of lung homogenized tissue was prepared in 500 μL 1 × NP40 Substitute Assay Reagent, and sonication was carried out for 2/10 seconds (burst/break) for 20 cycles. After centrifugation, the supernatants were acquired and diluted with 1X Standard Diluent at a ratio of 1:5.

Each supernatant from cells or tissue was taken into a 96-well plate in a volume of 10 μL. In parallel, the TAG Standard Solution was arranged by serial dilution method and transferred at the same volume. Afterward, the standard and test samples were incubated with 150 μL 1x Triglyceride Enzyme Mixture for 15 min at 20°C, the colorimetric changes were analyzed at 570 nm using a Multiskan Sky 1530 ELISA reader (Thermo Scientific). After generating a standard curve, each calculation was made, and the result was expressed as relative values compared with a mock-treated group.

**Quantitative real-time PCR**

As described previously, quantitative real-time PCR was performed to determine viral RNAs or host mRNAs in the cultured cells or lung tissue19,25. Total RNA from cells or tissue was extracted using an RNeasy kit (Qiagen), and cDNA was synthesized using TOPscript™ cDNA Synthesis kit (Enzynomics) according to the manufacturer’s protocol. Subsequently, real-time PCR was performed using a TOPreal™ qPCR 2X PreMix (Enzynomics) with a specific primer pair as listed in Supplementary Table 18, and the LineGene 9600 Plus Real-time PCR detection system (Bioer, Hangzhou, China) was used with the following conditions; for viral genome copy numbers, activation of the DNA polymerase at 95°C for 10 min and 40 cycles of three steps of 95°C for 15 s, 60°C for 20 s, and 72°C for 20 s, and for cellular target gene mRNA, activation of the DNA polymerase at 95°C for 10 min and 40 cycles of three steps of 95°C for 15 s, 55°C for 20 s, and 72°C for 20 s1.

The cycle threshold (Ct) values were automatically determined based on the initial exponential phase and the highest amplification rate. Relative quantification of RNAs was performed by analyzing the comparative Ct method.27 Cellular mRNA was expressed as a fold change in comparison with the mock-inoculated, mock-treated control. The reduction in viral load was expressed as relative values, where the viral genome copy number in the virus-infected, chemical-treated, or siRNA-transfected groups was compared to the virus-infected, mock-treated, or scrambled siRNA-transfected controls.

**Palmitoylation assay**

Post-translational protein modification in the IAV and SARS-CoV-2 proteins at cysteine residue with a palmitic acid through thioester formation (S-palmitoylation) was determined by the CAPTUREomeTM S-palmitoylated protein kit (Badrilla) as described previously1. In brief, 2x106 cells were collected after virus infection with or without chemical treatment and incubated with 400 μL of Buffer A, including Thiol Blocking Reagent, at 40°C for 4 h in a shaking heat block. Dissolved proteins were precipitated after the addition of 1.2 mL of 70% acetone, and the supernatant was removed by repeating washing and centrifugation 5 times. The pellet was reconstituted with 300 μL 1x Binding Buffer and incubated at 40°C for 30 min in a shaking heat block. After centrifugation, the supernatant was used for input control as a total protein lysate (50 μL) and further experiment to capture palmitoylated proteins (250 μL). The input control was mixed with 50 μL of 2x Laemmli Sample Buffer at 60°C for 10 min and stored at -20°C.

The cleavage of thioester bonds from palmitic acid was carried out by adding 50 μL CAPTUREomeTM Capture Resin and 19 μL Thio Cleavage Reagent to the supernatant on a rotary wheel at 20°C for 3 h, leading to the liberation of thiols bound to resin–assisted acyl-Rac. After centrifugation, the supernatant was removed, and the resin was washed with 1 mL of 1x Binding Buffer a total of five times for thorough purification. After the final wash, captured S-palmitoylated proteins were eluted with 100 μL of 2x Laemmli Sample Buffer at 60°C for 10 min, and the supernatant was collected.

To compare the palmitoylation level, the purified S-palmitoylated protein samples, as well as the input controls, were electrophoresed on an SDS-PAGE gel in parallel. After transferring proteins to a membrane, immunoblotting with antibodies targeting IAV HA and SARS-CoV-2 S proteins was carried out as described in the western blot analysis section. The percent reduction rate of protein palmitoylation in the virus-inoculated, chemical-treated group was calculated using the following formula, [(palmitoylated protein/input palmitoylated protein) in the virus-infected, chemical-treated group/(palmitoylated protein/input palmitoylated protein) in the virus-infected, mock-treated group)] × 100%.

**Transmission electron microscopy (TEM)**

Changes in the fine structures, such as the disappearance of intracytoplasmic double-membrane vesicles (DMVs) and virus particles in SARS-CoV-2-infected cells after DN200434 treatment, were determined by TEM as described elsewhere26,27. Briefly, Vero E6 cells prepared in a 6-well plate were infected with SARS-CoV-2 at a MOI of 0.1 FFU. After 1 h of virus absorption, each group received maintenance media containing vehicle or 10 μM DN200434. After 36 h of incubation, cells were washed thoroughly with DPBS and fixed primarily with 4% PFA on ice for 30 min.

The cells were pelleted in an Eppendorf tube after centrifugation and fixed with 2% PFA and 2% glutaraldehyde (EMS, Hatfield, UK) in 0.05 M sodium cacodylate buffer (pH 7.2, EMS) at 4°C for 4 h. The samples were washed three times with 0.05 M sodium cacodylate buffer (pH 7.2) and post-fixed with 1% osmium tetroxide (EMS) in 0.05 M sodium cacodylate buffer (pH 7.2) at 4°C for 1.5 h. After washing, they were treated with 0.5% uranyl acetate (EMS) at 4°C for 30 min, followed by gradual dehydration at 20°C in a series of ethanol: 30, 40, 50, 60, 70, 80, and 90% for 10 min one time and 100% for 10 min three times. Then, they were applied with 100% propylene oxide two times at 20°C for 15 min and infiltrated at 20°C for 8 h with Embed 812 resin mixture, in combination with 4 components; Embed 812:DDSA:NMA:DMP-30 (42:46:10:2, v/v). After polymerization at 60°C for 2 days, the EP tube was removed, and the embedded cell pellet was sectioned into 65-nm-thick slices by using a Leica Ultracut UCT microtome and a diamond knife. The slices were counterstained with 2% uranyl acetate (EMS) for 7 min, 2% Reynold’s lead citrate (EMS) for 7 min, and examined with a Zeiss EM 10 transmission electron microscope at 60 kV (Zeiss, Gottingen, Germany).

**Histopathology**

Histopathological analysis was carried out to check the antiviral effect in the lungs of mice or hamsters as previously described28. Tissue samples from experimental animals were fixed in 10% neutral formalin at 20°C for 3-4 days. After washing in tap water, trimmed tissues were transferred to the automatic embedding machine for the following steps: gradual dehydration from 60% to 100% ethanol, clearance in xylene, and embedment in paraffin block. The paraffin block was cut at a thickness of 3 μm by a microtome, and hematoxylin and eosin (H&E) staining or immunohistochemistry (IHC) were performed as previously described1. H&E sections were observed under light microscopy, and the morphological changes in each group were reviewed in a blinded manner, as previously described28.

**Immunohistochemistry (IHC)**

IHCs against IAV or SARS-CoV-2 proteins were performed to evaluate antiviral activity in the lung tissue. The tissue section was prepared in a 3μm thickness on a poly-l-lysine-coated slide and carried out as described elsewhere1,25. After deparaffinization in sufficient xylene, paraffin-embedded tissue was rehydrated and autoclaved in 10 mM citrate solution (pH 8.0) for antigen retrieval. Subsequently, endogenous peroxidase activity was removed by treatment of 3% H2O2 for 30 min at 20°C, and blocking with 5% bovine serum albumin (BSA) was performed for 1 h at 20°C. The slides received primary antibodies against IAV virion or SARS-CoV-2 S protein overnight at 4°C and HRP-conjugated secondary antibodies for 1-2 h at 4°C. Dako REAL™ EnVision™ Detection System (DakoCytomation, Denmark) was used for staining by 3, 3'-diaminobenzidine (DAB) and visualization of antigens according to the manufacturer’s instructions. After slight counterstaining with hematoxylin, the slides were dehydrated, cleared in xylene, and mounted.

**Illustrations**

Illustrations of animals (mouse and hamster) were created with BioRender software (https://biorender.com/).

**REFERENCES**

1. Baek, Y. B. et al. Therapeutic strategy targeting host lipolysis limits infection by SARS-CoV-2 and influenza A virus. *Signal Transduct. Target. Ther.* **7**, 367 (2022).
2. Alfajaro, M. M. et al. Early porcine sapovirus infection disrupts tight junctions and uses occludin as a coreceptor. *J. Virol.* **93**, e01773-18 (2019).
3. Kim, D. K. et al. Estrogen-related receptor γ controls hepatic CB1 receptor-mediated CYP2E1 expression and oxidative liver injury by alcohol. *Gut* **62**, 1044-1054 (2013).
4. Kim, D.K. et al. PKB/Akt phosphorylation of ERRγ contributes to insulin-mediated inhibition of hepatic gluconeogenesis. *Diabetologia* **57**, 2576-85. (2014).
5. Kim, D. K. et al. Estrogen-related receptor γ controls sterol regulatory element-binding protein-1c expression and alcoholic fatty liver. *Biochim. Biophys. Acta Mol. Cell Biol. Lipids* **1864**, 158521 (2019).
6. van Meerloo, J., Kaspers, G. J. & Cloos, J. Cell sensitivity assays: the MTT assay. *Methods Mol. Biol.* **731**, 237-245 (2011).
7. Birkemeyer, C., Kolasa, A. & Kopka, J. Comprehensive chemical derivatization for gas chromatography–mass spectrometry-based multi-targeted profiling of the major phytohormones. *J. Chromatogr. A*. **993**, 89-102 (2003).
8. Shanchun, J et al. Origins and simulated thermal alteration of sterols and keto-alcohols in deep-sea marine sediments of the Okinawa Trough. *Org. Geochem.* **21**, 415-422 (1994).
9. Santamaría, R. et al. BicOverlapper: A tool for bicluster visualization, Bioinformatics, **24**, 1212–1213 (2008).
10. Halasz, P., Holloway, G., Turner, S. J. & Coulson, B. S. Rotavirus replication in intestinal cells differentially regulates integrin expression by a phosphatidylinositol 3-kinase-dependent pathway, resulting in increased cell adhesion and virus yield. *J. Virol.* **82**, 148-160 (2008).
11. Tu, L. N. et al. Translocator protein (TSPO) affects mitochondrial fatty acid oxidation in steroidogenic cells. *Endocrinology* **157**, 1110-1121 (2016).
12. Gruber, A. D., Firsching, T. C., Trimpert, J. & Dietert, K. Hamster models of COVID-19 pneumonia reviewed: How human can they be? *Vet. Pathol.* **59**, 528-545 (2022).
13. Son, Y. O. et al. Estrogen-related receptor gamma causes osteoarthritis by upregulating extracellular matrix-degrading enzymes. *Nat. Commun.* **8**, 2133 (2017).
14. Lee, E. H. et al. Loss of SREBP-1c ameliorates iron-induced liver fibrosis by decreasing lipocalin-2. *Exp. Mol. Med.* **56**, 1001-1012 (2024).
15. Trompette, A. et al. Gut-derived short-chain fatty acids modulate skin barrier integrity by promoting keratinocyte metabolism and differentiation. *Mucosal Immunol.* **15**, 908-926 (2022).
16. Brown, E. G. Increased virulence of a mouse-adapted variant of influenza A/FM/1/47 virus is controlled by mutations in genome segments 4, 5, 7, and 8. *J. Virol.* **64**, 4523-4533 (1990).
17. Ilyushina, N. A. et al. Adaptation of pandemic H1N1 influenza virus in mice. *J. Virol.* **84**, 8607-8616 (2010).
18. Mueller, S. et al. Live attenuated influenza virus vaccines by computer-aided rational design. *Nat. Biotechnol.* **28**, 723-726 (2010).
19. Reed, L. J. & Muench, H. A simple method of estimating fifty percent endpoints. *Am. J. Epidemiol.* **27**, 493-497 (1938).
20. Karakus, U., Crameri, M., Lanz, C., and Yanguez E. Propagation and titration of influenza viruses. *Methods Mol. Biol.* **1836**, 59–88 (2018).
21. Kim, H. J. et al. Detection and genotyping of Korean porcine rotaviruses. *Vet. Microbiol.* **144**, 274-286 (2010).
22. Monson, E. et al. Intracellular lipid droplet accumulation occurs early following viral infection and is required for an efficient interferon response. *Nat. Commun.* **12**, 1-17 (2021).
23. Soliman, M. et al. Opposite effects of apoptotic and necroptotic cellular pathways on rotavirus replication. *J. Virol.* **96**, e0122221 (2022).
24. Parra-Vargas, M. et al. Delphinidin ameliorates hepatic triglyceride accumulation in human HepG2 cells, but not in diet-induced obese mice. *Nutrients* **10**, 1060 (2018).
25. Morita, M. et al. The lipid mediator protectin D1 inhibits influenza virus replication and improves severe influenza. *Cell* **153**, 112-125 (2013).
26. Paul S., Paul D., Fern G.R. & Ray A.K. Surface plasmon resonance imaging detection of silver nanoparticle-tagged immunoglobulin. *J. R. Soc. Interface*. **8**, 1204-11 (2011).
27. Twu, W. I. et al. Contribution of autophagy machinery factors to HCV and SARS-CoV-2 replication organelle formation. *Cell Rep*. **37**, 110049 (2021).
28. Sia, S. F. et al. Pathogenesis and transmission of SARS-CoV-2 in golden hamsters. *Nature* **583**, 834-838 (2020).
29. Wang, J. et al. Influenza virus exploits an interferon-independent lncRNA to preserve viral RNA synthesis through stabilizing viral RNA polymerase PB1. *Cell Rep.* **27**, 3295-3304. e3294 (2019).
30. Ogando, N. S. et al. SARS-coronavirus-2 replication in Vero E6 cells: replication kinetics, rapid adaptation and cytopathology. *J. Gen. Virol*. **101**, 925-940 (2020).
31. Schwarz, B. A. et al. Detection and quantitation of group A rotaviruses by competitive and real-time reverse transcription-polymerase chain reaction. *J. Virol. Methods* **105**, 277-285 (2002).
32. Kim, Y. et al. Trypsin-independent porcine epidemic diarrhea virus US strain with altered virus entry mechanism. *BMC Vet. Res.* **13**, 1-13 (2017).
33. Xiao, S. et al. Inhibition of highly pathogenic PRRSV replication in MARC-145 cells by artificial microRNAs. *Virol J*. **8**, 1-11 (2011).
34. Amer, H. M. & Almajhdi, F. N. Development of a SYBR Green I based real-time RT-PCR assay for detection and quantification of bovine coronavirus. *Mol. Cell. Probes* **25**, 101-107 (2011).
35. Paz, J. C. et al. Combinatorial regulation of a signal-dependent activator by phosphorylation and acetylation. *PNAS* **111**, 17116-17121 (2014).
36. Barr, F. G. et al. Examination of gene fusion status in archival samples of alveolar rhabdomyosarcoma entered on the Intergroup Rhabdomyosarcoma Study-III trial: a report from the Children's Oncology Group. J. Mol. Diagn. 8, 202-208 (2006).
37. Kuefner, M. S. et al. Secretory phospholipase A2 group IIA modulates insulin sensitivity and metabolism. *J. Lipid Res.* **58**, 1822-1833 (2017).
38. Deng, X. et al. Development and utilization of an infectious clone for porcine deltacoronavirus strain USA/IL/2014/026. *Virology* **553**, 35-45 (2021).
39. Lee JH, Lee SH, Lee EH, et al. SCAP deficiency facilitates obesity and insulin resistance through shifting adipose tissue macrophage polarization. *J Adv Res*. **45**, 1-13 (2023).

**Supplementary Tables**

**Supplementary Table 1. Identification of fatty acid following treatment of SARS-CoV-2-infected Vero E6 cells (MOI = 0.1 FFU) with vehicle or DN200434**

| **No.** | **RT (min)** | **Compound*** | **VIP** | ***p*-value** | ***ID*** |
| --- | --- | --- | --- | --- | --- |
| 1 | 9.56 | Myristic acid, TMS | 0.80 | 5.73E-02 | *NIST14, Wiley9* |
| 2 | 10.60 | Palmitoleic acid, methyl ester | 1.64 | 3.79E-10 | *NIST14, Wiley9* |
| 3 | 10.98 | Methyl palmitate | 1.82 | 1.45E-07 | *NIST14, Wiley9* |
| 4 | 11.36 | Pentadecanoic acid, TMS | 0.58 | 2.81E-01 | *NIST14, Wiley9* |
| 5 | 12.79 | Palmitelaidic acid, TMS | 0.92 | 3.92E-02 | *NIST14, Wiley9* |
| 6 | 13.19 | Palmitic Acid, TMS | 0.79 | 4.86E-03 | *NIST14, Wiley9* |
| 7 | 14.19 | 6-Octadecenoic acid, methyl ester | 1.85 | 9.18E-08 | *NIST14, Wiley9* |
| 8 | 14.29 | 9-Octadecenoic acid, methyl ester | 1.82 | 1.24E-06 | *NIST14, Wiley9* |
| 9 | 14.66 | Stearic acid methyl ester | 1.78 | 8.64E-06 | *NIST14, Wiley9* |
| 10 | 14.98 | Margaric acid, TMS | 1.05 | 1.58E-02 | *NIST14, Wiley9* |
| 11 | 16.14 | Linoleic acid, TMS | 0.71 | 5.10E-02 | *NIST14, Wiley9* |
| 12 | 16.26 | Oleic acid, TMS | 0.73 | 1.77E-02 | *NIST14, Wiley9* |
| 13 | 16.38 | 13-Octadecenoic acid, TMS | 0.77 | 6.54E-03 | *NIST14, Wiley9* |
| 14 | 16.57 | 11-Octadecenoic acid, TMS | 0.82 | 6.16E-03 | *NIST14, Wiley9* |
| 15 | 16.74 | Stearic acid, TMS | 0.78 | 7.78E-04 | *NIST14, Wiley9* |
| 16 | 18.83 | Arachidonic acid, TMS | 0.74 | 1.99E-02 | *NIST14, Wiley9* |
| 17 | 19.21 | Alpha-linolenic acid, TMS | 0.83 | 6.96E-04 | *NIST14, Wiley9* |
| 18 | 19.31 | 11,14-Eicosadienoic acid, TMS | 0.88 | 5.90E-05 | *NIST14, Wiley9* |
| 19 | 19.67 | 13-Eicosenoic acid, TMS | 0.83 | 3.09E-04 | *NIST14, Wiley9* |
| 20 | 19.79 | 11-Eicosenoic acid, TMS | 0.85 | 3.05E-04 | *NIST14, Wiley9* |
| 21 | 20.12 | Arachidic acid, TMS | 0.70 | 2.66E-04 | *NIST14, Wiley9* |
| 22 | 21.90 | Doconexent, TMS | 0.72 | 2.33E-02 | *NIST14, Wiley9* |
| 23 | 22.08 | 7,10,13,16-Docosatetraenoic acid, TMS | 0.72 | 2.67E-02 | *NIST14, Wiley9* |
| 24 | 22.20 | Eicosapentaenoic acid, TMS | 0.69 | 3.41E-02 | *NIST14, Wiley9* |
| 25 | 25.33 | Oleic acid amide | 0.76 | 1.23E-10 | *NIST14, Wiley9* |
| 26 | 30.36 | Cholesterol, TMS | 0.72 | 2.58E-02 | *NIST14, Wiley9* |

R.T., retention time. *TMS, trimethylsilyl group. VIP, variable importance in the projection.

**Supplementary Table 2. Identification of fatty acid following treatment of IAV-infected A549 cells (MOI = 1 FFU) with vehicle or DN200434**

| **No.** | **RT (min)** | **Compound*** | **VIP** | ***p*-value** | ***ID*** |
| --- | --- | --- | --- | --- | --- |
| 1 | 6.24 | Lauric acid, TMS | 1.45 | 2.41E-02 | *NIST14, Wiley9* |
| 2 | 9.54 | Myristic acid, TMS | 1.20 | 5.48E-02 | *NIST14, Wiley9* |
| 3 | 11.33 | Pentadecanoic acid, TMS | 0.98 | 7.47E-02 | *NIST14, Wiley9* |
| 4 | 12.67 | Palmitoleic acid, TMS | 0.90 | 5.66E-03 | *NIST14, Wiley9* |
| 5 | 12.76 | Palmitelaidic acid, TMS | 0.84 | 5.58E-04 | *NIST14, Wiley9* |
| 6 | 13.16 | Palmitic Acid, TMS | 1.07 | 3.59E-03 | *NIST14, Wiley9* |
| 7 | 14.16 | 9-Octadecenoic acid, methyl ester | 0.55 | 5.41E-02 | *NIST14, Wiley9* |
| 8 | 14.27 | 11-Octadecenoic acid, methyl ester | 0.74 | 1.54E-02 | *NIST14, Wiley9* |
| 9 | 14.94 | margaric acid, TMS | 1.21 | 7.87E-04 | *NIST14, Wiley9* |
| 10 | 15.61 | alpha.-Linolenic acid, TMS | 1.17 | 3.27E-07 | *NIST14, Wiley9* |
| 11 | 15.83 | 9,12-Octadecadienoic acid (Z,Z)-, TMS | 0.99 | 3.33E-05 | *NIST14, Wiley9* |
| 12 | 16.01 | Linoelaidic acid, TMS | 0.90 | 5.79E-05 | *NIST14, Wiley9* |
| 13 | 16.10 | 9,12-Octadecadienoic acid (Z,Z)-, TMS | 1.37 | 4.52E-03 | *NIST14, Wiley9* |
| 14 | 16.23 | Oleic Acid, TMS | 1.01 | 1.38E-03 | *NIST14, Wiley9* |
| 15 | 16.35 | 9-Octadecenoic acid, TMS | 0.91 | 4.48E-04 | *NIST14, Wiley9* |
| 16 | 16.53 | 13-Octadecenoic acid, TMS | 0.96 | 4.82E-04 | *NIST14, Wiley9* |
| 17 | 16.71 | Stearic acid, TMS | 1.08 | 4.10E-04 | *NIST14, Wiley9* |
| 18 | 18.79 | Arachidonic acid, TMS | 0.85 | 3.69E-03 | *NIST14, Wiley9* |
| 19 | 19.05 | 5,8,11-Eicosatrienoic acid, TMS | 1.13 | 4.10E-07 | *NIST14, Wiley9* |
| 20 | 19.43 | 11,14-Eicosadienoic acid, TMS | 0.97 | 2.54E-05 | *NIST14, Wiley9* |
| 21 | 19.55 | 11-Eicosenoic acid, TMS | 0.79 | 1.27E-02 | *NIST14, Wiley9* |
| 22 | 19.63 | 13-Eicosenoic acid, TMS | 0.76 | 2.30E-02 | *NIST14, Wiley9* |
| 23 | 20.07 | Arachidic acid, TMS | 0.54 | 4.29E-02 | *NIST14, Wiley9* |
| 24 | 21.86 | Doconexent, TMS | 0.97 | 2.00E-03 | *NIST14, Wiley9* |
| 25 | 22.14 | 7,10,13,16-Docosatetraenoic acid, TMS | 1.02 | 1.91E-05 | *NIST14, Wiley9* |
| 26 | 30.32 | Cholesterol, TMS | 1.35 | 4.69E-02 | *NIST14, Wiley9* |

R.T., retention time. *TMS, trimethylsilyl group. VIP, variable importance in the projection.

**Supplementary Table 3. The median cytotoxic concentration (CC50) of DN200434 in different cell lines determined by measuring the cellular NAD(P)H-dependent cellular oxidoreductase enzymes (MTT assay)**

| **Cell line** | **CC50**a **(μM)** |
| --- | --- |
| A549 | 87.8 ± 13.2 |
| Vero E6 | 92.5 ± 18.6 |
| MDCK | 103.6 ± 14.1 |
| HRT-18G | 83.8 ± 12.5 |
| MA104 | 90.7 ± 11.5 |
| MARC-145 | 95.1 ± 14.9 |
| LLC-PK | 106.7 ± 19.6 |

aCC50, half-maximal cytotoxic concentration calculated with 95% confidence interval (CI)

**Supplementary Table 4. The half maximal (50%) inhibitory concentration (IC50) and selectivity index (SI) of DN200434 for seven RNA viruses**

| **Virus family** | **Virus (strain)** | **IC50 a (μM)** | **SI b (CC50/IC50)** |  |
| --- | --- | --- | --- | --- |
|  |
| *Orthomyxoviridae* | Influenza A virus Puerto Rico/8/1934 (H1N1) | 2.61 ± 0.41 | 34 |  |
| *Coronaviridae* | SARS-CoV-2 (KCDC03) | 1.89 ± 0.13 | 49 |  |
| *Coronaviridae* | Bovine coronavirus (KWD20) | 3.00 ± 0.37 | 28 |  |
| *Coronaviridae* | Porcine epidemic diarrhea  coronavirus (QIAP1401) | 3.49 ± 0.39 | 27 |  |
| *Reoviridae* | Species A Rotavirus (NCDV) | 2.56 ± 0.27 | 35 |  |
| *Arteriviridae* | Porcine respiratory reproductive syndrome virus (LMY) | 5.04 ± 0.44 | 19 |  |
| *Caliciviridae* | Porcine sapovirus (Cowden) | 6.42 ± 1.00 | 17 |  |

aIC50, Half-maximal inhibitory concentration calculated with 95% CI

bSI, Selectivity index, calculated as CC50/IC50.

**Supplementary Table 5. Cell culture information**

| **Cell line** |  | **Origin** |  | **Source** |  | **Medium** |  | **Supplementation** |
| --- | --- | --- | --- | --- | --- | --- | --- | --- |
| Vero E6 |  | African green monkey kidney epithelium |  | ATCC |  | EMEM |  | 10% FBS, 1% P/S |
| A549 |  | Human lung carcinoma |  | ATCC |  | DMEM |  | 10% FBS, 1% P/S |
| Caco-2 |  | Human colorectal adenocarcinoma |  | ATCC |  | DMEM |  | 10% FBS, 1% P/S |
| HRT-18G |  | Human colorectal adenocarcinoma |  | ATCC |  | DMEM |  | 10% FBS, 1% P/S |
| MDCK |  | Canine kidney epithelium |  | ATCC |  | EMEM |  | 10% FBS, 1% P/S |
| MA104 |  | Rhesus monkey kidney epithelium |  | ATCC |  | α-MEM |  | 10% FBS, 1% P/S |
| MARC-145 |  | African green monkey kidney epithelium |  | ATCC |  | DMEM |  | 10% FBS, 1% P/S |
| LLC-PK |  | Porcine kidney epithelium |  | ATCC |  | EMEM |  | 10% FBS, 1% P/S |

Abbreviations: ATCC, American Type Culture Collection; FBS, fetal bovine serum; DMEM, Dulbecco’s modified Eagle’s medium; EMEM, Eagle’s Minimum Essential Medium; α-MEM, Minimal Essential Medium alpha modification; 1% P/S, 100 U/mL penicillin and 100 μg/mL streptomycin.

**Supplementary Table 6. Virus information**

| **Viruses** |  | **Strain name (genotypes)** |  | **Source** |
| --- | --- | --- | --- | --- |
| Severe Acute Respiratory Syndrome coronavirus 2 (SARS-CoV-2) |  | KCDC03 (Lineage A) |  | Korea Disease Control and Prevention Agency |
|  | KDCA51463 (Alpha lineage, British variant) |  | Korea Disease Control and Prevention Agency |
|  | KDCA55905 (Beta lineage, South African variant) |  | Korea Disease Control and Prevention Agency |
| Influenza A virus (IAV) |  | Puerto Rico/8 (PR8) (H1N1) |  | American Type Culture Collection |
| Bovine coronavirus (BCoV) |  | KWD20 |  | Isolated from fecal samples and propagated in HRT-18G cells |
| Porcine epidemic diarrhea coronavirus (PEDV) |  | QIAP1401 (G2b) |  | Animal and Plant Quarantine Agency, Korea |
| Bovine species A rotavirus (bovine RVA) |  | NCDV (G6P6[1]) |  | American Type Culture Collection |
| Porcine Reproductive and Respiratory Syndrome virus (PRRSV) |  | LMY (North American type) |  | Animal and Plant Quarantine Agency, Korea |
| Porcine sapovirus (PSaV) |  | Cowden (GIII.1) |  | A kind gift from Dr. K.O. Chang, Kansas State University |

**Supplementary Table 7. Virus culture information**

| **Viruses** | **Cell lines** | **Activation of viruses** | **Medium** | **Supplementation*** |
| --- | --- | --- | --- | --- |
| IAV | A549 | N/A | DMEM | 1 μg/mL TPCK-treated trypsin, 1% P/S |
| MDCK | N/A | DMEM | 1 μg/mL TPCK-treated trypsin, 1% P/S |
| Vero E6 | N/A | EMEM | 1 μg/mL TPCK-treated trypsin, 1% P/S |
| Caco-2 | N/A | DMEM | 1 μg/mL TPCK-treated trypsin, 1% P/S |
| SARS-CoV-2 | Vero E6 | N/A | EMEM | 1 μg/mL TPCK-treated trypsin, 1% P/S |
| BCoV | HRT-18G | N/A | DMEM | 5 μg/mL porcine pancreatin, 1% P/S |
| PEDV | Vero E6 | N/A | EMEM | 3 μg/mL porcine pancreatic trypsin, 1% P/S |
| Bovine RVA | MA104 | Preactivation with 10 μg/mL porcine trypsin | α-MEM | 1 μg/mL crystalized trypsin, 1% P/S |
| PRRSV | MARC-145 | N/A | DMEM | 1% P/S |
| PSaV | LLC-PK | N/A | EMEM | 2.5% FBS, 200 μM GCDCA, 1% P/S |

Abbreviations: FBS, fetal bovine serum; DMEM, Dulbecco’s modified Eagle’s medium; EMEM, Eagle’s Minimum Essential Medium; α-MEM, alpha Minimal Essential Medium; 1% P/S: 100 U/mL penicillin, 100 μg/mL streptomycin; TPCK-treated trypsin, N-tosyl-L-phenylalanine chloromethyl ketone (TPCK)-treated trypsin; GCDCA, glycochenodeoxycholic acid.

**Supplementary Table 8. Chemicals, kits, and siRNAs used in this study**

| **Regents** | **Company** | **City/State** | **Country** | **Solvent** |
| --- | --- | --- | --- | --- |
| **Chemicals** |  |  |  |  |
| Porcine pancreatic trypsin | Sigma Aldrich | St. Louis, MO | USA | PBS |
| Crystalized trypsin | Gibco | Fort Worth, TX | USA | PBS |
| Pancreatin | Gibco | Fort Worth, TX | USA | PBS |
| TPCK-treated trypsin | Sigma Aldrich | St. Louis, MO | USA | PBS |
| GCDCA | Sigma Aldrich | St. Louis, MO | USA | PBS |
| MTT | Sigma Aldrich | St. Louis, MO | USA | PBS |
| Triton X-100 | Sigma Aldrich | St. Louis, MO | USA | PBS |
| BODIPY 493/503 | Sigma Aldrich | St. Louis, MO | USA | PBS |
| Slow-Fade Gold antifade reagent | Molecular Probes | Eugene, OR | USA | - |
| Ultrapure agarose | Thermo Scientific | Waltham, MA | USA | DDW |
| Paraformaldehyde | Sigma Aldrich | St. Louis, MO | USA | - |
| Corn oil | Sigma Aldrich | St. Louis, MO | USA | DMSO |
| DN200434 | NovMetaPharma | Seoul | Korea | DMSO |
| Remdesivir | Sigma Aldrich | St. Louis, MO | USA | DMSO |
| Oseltamivir | Sigma Aldrich | St. Louis, MO | USA | PBS |
| Palmitic acid | Sigma Aldrich | St. Louis, MO | USA | PBS |
| Oleic acid | Sigma Aldrich | St. Louis, MO | USA | PBS |
| Linoleic acid | Sigma Aldrich | St. Louis, MO | USA | PBS |
| Arachidonic acid | Sigma Aldrich | St. Louis, MO | USA | PBS |
| **Kits** |  |  |  |  |
| Bicinchoninic acid (BCA) protein assay | Thermo Scientific | Waltham, MA | USA | - |
| NE-PER™ Nuclear and Cytoplasmic Extraction Reagents | Thermo Scientific | Waltham, MA | USA | - |
| SimpleChIP Plus Enzymatic Chromatin IP Kit | Cell Signaling | Beverly, MA | USA | - |
| Luciferase Assay System | Promega | Madison, WI | USA | - |
| Triglyceride colorimetric assay kit | Abcam | Cambridge, MA | USA | - |
| Cholesterol colorimetric assay kit | Abcam | Cambridge, MA | USA | - |
| CAPTUREomeTM S-palmitoylated protein kit | Badrilla | Leeds | UK | - |
| RNeasy mini kit | Qiagen | Hilden | Germany | - |
| TOPscript™ cDNA synthesis kit | Enzynomics | Daejeon | South Korea | - |
| Total ROS detection kit | Enzo Life Sciences | Farmingdale, NY | USA | - |
| IFN alpha ELISA kit | Thermo Scientific | Waltham, MA | USA | - |
| IFN beta ELISA kit | Thermo Scientific | Waltham, MA | USA | - |
| IL-6 ELISA kit | Thermo Scientific | Waltham, MA | USA | - |
| TNF alpha ELISA kit | Thermo Scientific | Waltham, MA | USA | - |
| MCP-1 ELISA kit | Thermo Scientific | Waltham, MA | USA | - |
| LTB4 competitive ELISA kit | Thermo Scientific | Waltham, MA | USA | - |
| PGE2 competitive ELISA kit | Thermo Scientific | Waltham, MA | USA | - |
| Fatty Acid Oxidation Assay kit | Assay Genie | Dublin | Ireland | - |
| **siRNAs** |  |  |  |  |
| AccuTarget™ Predesigned siRNA (mixtures) | Bioneer | Daejeon | South Korea | RNAse free water |
| Lipofectamine3000 | Thermo Scientific | Waltham, MA | USA | - |

**Supplementary Table 9. Antibodies used in this study**

| **Antibodies*** | **Host** | **Type*** | **Conjugation** | **Company** | **City/State** | **Country** | **Solvent*** |
| --- | --- | --- | --- | --- | --- | --- | --- |
| **Primary antibodies** |  |  |  |  |  |  |  |
| ERRγ | Mouse | Mab | - | R&D Systems | Minneapolis, MN | USA | TBST (5% BSA) |
| SREBP-1 | Rabbit | Pab | - | Abcam | Cambridge | UK | TBST (5% BSA) |
| SREBP-2 | Rabbit | Pab | - | Abcam | Cambridge | UK | TBST (5% BSA) |
| SARS-CoV-2 dsRNA | Mouse | Mab | - | Scicons | Nógrád County | HU | PBS (5% BSA) |
| SARS-CoV-2 S | Rabbit | Pab | - | Prosci | San Diego, CA | USA | TBST (5% BSA) |
| SARS-CoV-2 N | Mouse | Mab | - | Prosci | San Diego, CA | USA | TBST (5% BSA) |
| IAV M2 | Mouse | Mab | - | Abcam | Cambridge | UK | TBST (5% BSA) |
| IAV NP | Mouse | Mab | - | Abcam | Cambridge | UK | TBST (5% BSA) |
| IAV PB1 | Rabbit | Pab | - | Novus Biologicals | Centennial, CO | USA |  |
| IAV HA | Rabbit | Pab | - | Santa Cruz | Dallas, TX, | USA | TBST (5% BSA) |
| IAV virion | Goat | Pab | - | Viasat | Carlsbad, CA | USA | TBST (5% BSA) |
| GAPDH | Mouse | Mab | - | Santa Cruz | Dallas, TX, | USA | TBST (5% BSA) |
| β-actin | Mouse | Mab | - | Thermo Scientific | Waltham, MA | USA | TBST (5% BSA) |
| BCoV S | Mouse | Mab | - | Native Antigen Company | Killington | UK | TBST (5% BSA) |
| PEDV N | Mouse | Mab | - | Medgene Labs | Brookings, SD | USA | TBST (5% BSA) |
| RVA VP6 | Mouse | Mab | - | Median Diagnostic | Chuncheon | South Korea | TBST (5% BSA) |
| PRRSV M | Rabbit | Pab | - | Bioss Antibodies | Woburn, MA | USA | TBST (5% BSA) |
| PSaV VPg | Rabbit | Antiserum | - | Manufactured in the laba |  |  | TBST (5% BSA) |
| **Secondary antibodies** | | | | | | | |
| Rabbit IgG(H+L) | Goat | Pab | HRP | Cell Signaling | Beverly, MA | USA | 1xTBST |
| Goat IgG(H+L) | Rabbit | Pab | HRP | Cell Signaling | Beverly, MA | USA | 1xTBST |
| Mouse IgGκ | Goat | Mab | HRP | Santa Cruz | Dallas, TX | USA | 1xTBST |
| AF647 rabbit IgG | Donkey | Pab | AF647 | Thermo Scientific | Waltham, MA | USA | 1xPBS |
| AF594 rabbit IgG | Donkey | Pab | AF594 | Thermo Scientific | Waltham, MA | USA | 1xPBS |
| AF488 rabbit IgG | Donkey | Pab | AF488 | Thermo Scientific | Waltham, MA | USA | 1xPBS |
| AF647 mouse IgG | Goat | Pab | AF647 | Thermo Scientific | Waltham, MA | USA | 1xPBS |
| AF594 mouse IgG | Goat | Pab | AF594 | Thermo Scientific | Waltham, MA | USA | 1xPBS |
| AF488 mouse IgG | Goat | Pab | AF488 | Thermo Scientific | Waltham, MA | USA | 1xPBS |

*Abbreviation: SARS-CoV-2 S, SARS-CoV-2 spike; SARS-CoV-2 N, SARS-CoV-2 nucleocapsid; IAV M2, IAV membrane; IAV NP, IAV nucleoprotein; IAV HA, IAV hemagglutinin; BCoV S, BCoV spike protein; PEDV N, PEDV nucleoprotein; RVA VP6, viral structural protein 6; PRRSV M, PRRSV matrix protein; PSaV VPg, PSaV viral genome-linked protein; Mab or Pab: monoclonal or polyclonal antibodies; HRP: horseradish peroxidase; 1xTBST; 1x Tris-Buffered Saline containing 0.1% Tween® 20 Detergent; TBST (5% BSA); 1x TBST containing 5% BSA (Bovine Serum Albumin)

aGenerated by immunization of a New Zealand White rabbit with purified PSaV VPg.2

**Supplementary Table 10. Experimental design for assessing the antiviral effects of DN200434 on influenza A virus infection in the mouse model**

| Group | Animal | | |  | Inoculum | | |  | Treatment | | | | Exp. Period (day) |
| --- | --- | --- | --- | --- | --- | --- | --- | --- | --- | --- | --- | --- | --- |
| Breed | Age | No. |  | Strain | Titer | Route |  | Chemical | Dosage | Route | Administration |
| 1 | C57BL/6J | 8 wk | 16 |  | PBS | None | INa |  | Vehicleb | None | IPc | Bidd for 4 days | 15 |
| 2 | C57BL/6J | 8 wk | 16 |  | PR8 | 103 PFU | IN |  | Vehicle | None | IP | Bid for 4 days | 15 |
| 3 | C57BL/6J | 8 wk | 16 |  | PR8 | 103 PFU | IN |  | DN200434 | 10 mg kg-1 d-1 | IP | Bid for 4 days | 15 |
| 4 | C57BL/6J | 8 wk | 16 |  | PR8 | 103 PFU | IN |  | DN200434 | 20 mg kg-1 d-1 | IP | Bid for 4 days | 15 |
| 5 | C57BL/6J | 8 wk | 16 |  | PR8 | 103 PFU | IN |  | DN200434 | 40 mg kg-1 d-1 | IP | Bid for 4 days | 15 |

aIN, intranasal inoculation.

bVehicle, 5% DMSO + 95% of 20% PEG 400 in saline (v/v)

cIP, intraperitoneal administration.

dBid, twice daily with a 12-h interval.

**Supplementary Table 11. Experimental design for assessing the antiviral effects of DN200434 on SARS-CoV-2 KCDC03 strain infection in the Syrian hamster model**

| Group | Animal | | |  | Inoculum | | |  | Treatment | | | | Exp. Period (day) |
| --- | --- | --- | --- | --- | --- | --- | --- | --- | --- | --- | --- | --- | --- |
| Breed | Age | No. |  | Strain | Titer | Route |  | Chemical | Dosage | Route | Administration |
| 1 | Syrian | 12 wk | 5 |  | PBS | None | ITa |  | Vehicleb | None | IPc | Bidd for 4.5 days | 5 |
| 2 | Syrian | 12 wk | 5 |  | KCDC03 | 105 TCID50 | IT |  | Vehicle | None | IP | Bid for 4.5 days | 5 |
| 3 | Syrian | 12 wk | 5 |  | KCDC03 | 105 TCID50 | IT |  | DN200434 | 10 mg kg-1 d-1 | IP | Bid for 4.5 days | 5 |
| 4 | Syrian | 12 wk | 5 |  | KCDC03 | 105 TCID50 | IT |  | DN200434 | 20 mg kg-1 d-1 | IP | Bid for 4.5 days | 5 |
| 5 | Syrian | 12 wk | 5 |  | KCDC03 | 105 TCID50 | IT |  | DN200434 | 40 mg kg-1 d-1 | IP | Bid for 4.5 days | 5 |

aIT, intratracheal inoculation.

bVehicle, 50% PEG400 in water (v/v).

cIP, intraperitoneal administration.

dBid, twice daily with a 12-h interval.

**Supplementary Table 12. Experimental design for determining the antiviral efficacy by combination therapy of DN200434 and oseltamivir on influenza A virus infection in the mouse model**

| Group | Animal | | |  | Inoculum | | |  | Treatment | | | | Exp. Period (day) |
| --- | --- | --- | --- | --- | --- | --- | --- | --- | --- | --- | --- | --- | --- |
| Breed | Age | No. |  | Strain | Titer | Route |  | Chemical | Dosage | Route | Administration |
| 1 | C57BL/6J | 8 wk | 16 |  | PBS | None | INa |  | Vehicleb | None | IPc | Bidd for 4 days | 15 |
| 2 | C57BL/6J | 8 wk | 16 |  | PR8 | 103 PFU | IN |  | Vehicle | None | IP | Bid for 4 days | 15 |
| 3 | C57BL/6J | 8 wk | 16 |  | PR8 | 103 PFU | IN |  | Oseltamivir | 2 mg kg-1 d-1 | Oral | Bid for 4 days | 15 |
| 4 | C57BL/6J | 8 wk | 16 |  | PR8 | 103 PFU | IN |  | DN200434 | 20 mg kg-1 d-1 | IP | Bid for 4 days | 15 |
| 5 | C57BL/6J | 8 wk | 16 |  | PR8 | 103 PFU | IN |  | Oseltamivir | 2 mg kg-1 d-1 | Oral | Bid for 4 days | 15 |
| + | DN200434 | 10 mg kg-1 d-1 | IP | Bid for 4 days |

aIN, intranasal inoculation.

bVehicle, 10% PEG400 in water (v/v).

cIP, intraperitoneal administration.

dBid, twice daily with a 12-h interval.

**Supplementary Table 13. Experimental design for determining the antiviral efficacy by combination therapy of DN200434 and remdesivir on infection of SARS-CoV-2 KCDC03 strain (lineage A) in the Syrian hamster model**

| Group | Animal | | |  | Inoculum | | |  | Treatment | | | | Exp. Period (day) |
| --- | --- | --- | --- | --- | --- | --- | --- | --- | --- | --- | --- | --- | --- |
| Breed | Age | No. |  | Strain | Titer | Route |  | Chemical | Dosage | Route | Administration |
| 1 | Syrian | 12 wk | 5 |  | PBS | None | ITa |  | Vehicleb | None | IPc | Bidd for 4.5 days | 5 |
| 2 | Syrian | 12 wk | 5 |  | KCDC03 | 105 TCID50 | IT |  | Vehicle | None | IP | Bid for 4.5 days | 5 |
| 3 | Syrian | 12 wk | 5 |  | KCDC03 | 105 TCID50 | IT |  | Remdesivir | 2.5 mg kg-1 d-1 | IP | Bid for 4.5 days | 5 |
| 4 | Syrian | 12 wk | 5 |  | KCDC03 | 105 TCID50 | IT |  | DN200434 | 40 mg kg-1 d-1 | IP | Bid for 4.5 days | 5 |
| 5 | Syrian | 12 wk | 5 |  | KCDC03 | 105 TCID50 | IT |  | Remdesivir | 2.5 mg kg-1 d-1 | IP | Bid for 4.5 days | 5 |
|  |  |  |  |  |  |  |  | + | DN200434 | 20 mg kg-1 d-1 | IP | Bid for 4.5 days |  |

aIT, intratracheal inoculation.

bVehicle, 50% PEG400 in water (v/v).

cIP, intraperitoneal administration.

dBid, twice daily with a 12-h interval.

**Supplementary Table 14. Experimental design for determining the antiviral efficacy by combination therapy of DN200434 and remdesivir on infection of SARS-CoV-2** **KDCA51463 strain (Alpha lineage, British variant) in the Syrian hamster model**

| Group | Animal | | |  | Inoculum | | |  | Treatment | | | | Exp. Period (day) |
| --- | --- | --- | --- | --- | --- | --- | --- | --- | --- | --- | --- | --- | --- |
| Breed | Age | No. |  | Strain | Titer | Route |  | Chemical | Dosage | Route | Administration |
| 1 | Syrian | 12 wk | 5 |  | PBS | None | ITa |  | Vehicleb | None | IPc | Bidd for 4.5 days | 5 |
| 2 | Syrian | 12 wk | 5 |  | KDCA51463 | 105 TCID50 | IT |  | Vehicle | None | IP | Bid for 4.5 days | 5 |
| 3 | Syrian | 12 wk | 5 |  | KDCA51463 | 105 TCID50 | IT |  | Remdesivir | 2.5 mg kg-1 d-1 | IP | Bid for 4.5 days | 5 |
| 4 | Syrian | 12 wk | 5 |  | KDCA51463 | 105 TCID50 | IT |  | DN200434 | 40 mg kg-1 d-1 | IP | Bid for 4.5 days | 5 |
| 5 | Syrian | 12 wk | 5 |  | KDCA51463 | 105 TCID50 | IT |  | Remdesivir | 2.5 mg kg-1 d-1 | IP | Bid for 4.5 days | 5 |
|  |  |  |  |  |  |  |  | + | DN200434 | 20 mg kg-1 d-1 | IP | Bid for 4.5 days |  |

aIT, intratracheal inoculation.

bVehicle, 50% PEG400 in water (v/v).

cIP, intraperitoneal administration.

dBid, twice daily with a 12-h interval.

**Supplementary Table 15. Experimental design for determining the antiviral efficacy by combination therapy of DN200434 and remdesivir on infection of SARS-CoV-2 KDCA55905 strain (Beta lineage, South African variant) in the Syrian hamster model**

| Group | Animal | | |  | Inoculum | | |  | Treatment | | | | Exp. Period (day) |
| --- | --- | --- | --- | --- | --- | --- | --- | --- | --- | --- | --- | --- | --- |
| Breed | Age | No. |  | Strain | Titer | Route |  | Chemical | Dosage | Route | Administration |
| 1 | Syrian | 12 wk | 5 |  | PBS | None | ITa |  | Vehicleb | None | IPc | Bidd for 4.5 days | 5 |
| 2 | Syrian | 12 wk | 5 |  | KDCA55905 | 105 TCID50 | IT |  | Vehicle | None | IP | Bid for 4.5 days | 5 |
| 3 | Syrian | 12 wk | 5 |  | KDCA55905 | 105 TCID50 | IT |  | Remdesivir | 2.5 mg kg-1 d-1 | IP | Bid for 4.5 days | 5 |
| 4 | Syrian | 12 wk | 5 |  | KDCA55905 | 105 TCID50 | IT |  | DN200434 | 40 mg kg-1 d-1 | IP | Bid for 4.5 days | 5 |
| 5 | Syrian | 12 wk | 5 |  | KDCA55905 | 105 TCID50 | IT |  | Remdesivir | 2.5 mg kg-1 d-1 | IP | Bid for 4.5 days | 5 |
|  |  |  |  |  |  |  |  | + | DN200434 | 20 mg kg-1 d-1 | IP | Bid for 4.5 days |  |

aIT, intratracheal inoculation.

bVehicle, 50% PEG400 in water (v/v).

cIP, intraperitoneal administration.

dBid: twice daily with a 12-h interval.

**Supplementary Table 16. Experimental design for determining the inhibitory effects of DN200434 on triacylglycerol contents, virus replication, and histopathological lesions in the lungs from IAV-infected mice**

| Group | Animal | | |  | Inoculum | | |  | Treatment | | | | Exp. Period (day) |
| --- | --- | --- | --- | --- | --- | --- | --- | --- | --- | --- | --- | --- | --- |
| Breed | Age | No. |  | Strain | Titer | Route |  | Chemical | Dosage | Route | Administration |
| 1 | C57BL/6J | 8 wk | 4 |  | PBS | None | INa |  | Vehicleb | None | IPc | Bidd for 4 days | 6 |
| 2 | C57BL/6J | 8 wk | 4 |  | PR8 | 103 PFU | IN |  | Vehicle | None | IP | Bid for 4 days | 6 |
| 3 | C57BL/6J | 8 wk | 4 |  | PR8 | 103 PFU | IN |  | DN200434 | 20 mg kg-1 d-1 | IP | Bid for 4 days | 6 |

aIN: intranasal inoculation.

bVehicle, 10% PEG400 in water (v/v).

cIP, intraperitoneal administration.

dBid, twice daily with a 12-h interval.

**Supplementary Table 17. Experimental design for determining the inhibitory effects of DN200434 on triacylglycerol contents and glycerol, virus replication, and histopathological lesions in the lungs from SARS-CoV-2-infected hamsters**

| Group | Animal | | |  | Inoculum | | |  | Treatment | | | | Exp. Period (day) |
| --- | --- | --- | --- | --- | --- | --- | --- | --- | --- | --- | --- | --- | --- |
| Breed | Age | No. |  | Strain | Titer | Route |  | Chemical | Dosage | Route | Administration |
| 1 | Syrian | 12 wk | 5 |  | PBS | None | ITa |  | Vehicleb | None | IPc | Bidd for 4.5 days | 5 |
| 2 | Syrian | 12 wk | 5 |  | KCDC03 | 105 TCID50 | IT |  | Vehicle | None | IP | Bid for 4.5 days | 5 |
| 3 | Syrian | 12 wk | 5 |  | KCDC03 | 105 TCID50 | IT |  | DN200434 | 10 mg kg-1 d-1 | IP | Bid for 4.5 days | 5 |
| 4 | Syrian | 12 wk | 5 |  | KCDC03 | 105 TCID50 | IT |  | DN200434 | 20 mg kg-1 d-1 | IP | Bid for 4.5 days | 5 |
| 5 | Syrian | 12 wk | 5 |  | KCDC03 | 105 TCID50 | IT |  | DN200434 | 40 mg kg-1 d-1 | IP | Bid for 4.5 days | 5 |

aIT, intratracheal inoculation.

bVehicle, 50% PEG400 in water (v/v).

cIP, intraperitoneal administration.

dBid, twice daily with a 12-h interval.

**Supplementary Table 18. Primers used for the detection of viral and host genes**

| **Name**a | **Sequence** | **Size of amplicon** | **Reference number** |
| --- | --- | --- | --- |
| IAV PB1 | F: 5’-CTGCCAGAAGACAATGAACC-3’ | 66 | 29 |
| R: 5’-GGCCATTGCTTCCAATACAC-3’ |  |
| SARS-CoV-2 N | F: 5’-TAATCAGACAAGGAACTGATTA-3’ | 109 | 30 |
| R: 5’-CGAAGGTGTGACTTCCATG’ -3’ |  |
| RVA VP6 | F: 5’-TAGACCAAATAACGTTGAAGTTGA-3’ | 236 | 31 |
| R: 5’-GATTCACAAACTGCAGATTCAA-3’ |  |
| PEDV N | F: 5’-GCTATGCTCAGATCGCCAGT-3’ | 92 | 32 |
| R: 5’-TCTCGTAAGAGTCCGCTAGCTC-3’ |  |
| PRRSV M | F: 5’-CACCTCCAGATGCCGTTTG-3’ | 113 | 33 |
| R: 5’-ATGCGTGGTTATCATTTGCC-3’ |  |
| PSaV VPg | F: 5’-CGAAAGGGAAAAACAAACGC-3’ | 239 | 2 |
| R: 5’-TCACTCACTGTCATAGGTGTCACC-3’ |  |
| BCoV N | F: 5’-TGGATCAAGATTAGAGTTGGC-3’ | 236 | 34 |
| R: 5’-CCTTGTCCATTCTTCTGACC-3’ |  |
| L32 | F: 5’-TCTGGTGAAGCCCAAGATCG-3’ | 101 | 35 |
| R: 5’-CTCTGGGTTTCCGCCAGT-3’ |  |
| Human GAPDH | F: 5’-ATTCCACCCATGGCAAATTC-3’ | 90 | 36 |
| R: 5’-CGCTCCTGGAAGATGGTGAT-3’ |  |
| Mouse GAPDH | F: 5’-AAGGTCATCCCAGAGCTGAA-3’ | 137 | 37 |
| R: 5’-CTGCTTCACCACCTTCTTGA-3’ |  |
| Porcine GAPDH | F: 5’-ACCTCCACTACATGGTCTACA-3’ | 90 | 38 |
| R: 5’-ATGACAAGCTTCCCGTTCTC-3’ |  |
| ERRα | F: 5’-GCCTTCTTCAAGAGGACCAT-3’ | 140 | 3 |
|  | R: 5’-TCCTTGAGCATGCCCACCCG-3’ |  |  |
| ERRγ | F: 5’-TATAGAATACAGCTGCCCTG-3’ | 124 | 3 |
|  | R: 5’-AAGACGCACCCCTTCTTTCA-3’ |  |  |
| SREBP-1a | F: 5’- ATGGACGAGCCACCCTTCAG-3’ | 256 | 39 |
|  | R: 5’- CCCCACTCCCAGCATAGGGT -3’ |  |  |
| SREBP-1c | F: 5’- GAGCTCAAGGATCTGGTGGT -3’ | 135 | 39 |
|  | R: 5’- CAGTGCGCAGACTTAGGTTC -3’ |  |  |

*Abbreviations: IAV PB1, influenza A virus RNA-directed RNA polymerase catalytic subunit gene; SARS-CoV-2 N, severe acute respiratory syndrome coronavirus 2 nucleocapsid protein gene; RVA VP6, species A rotavirus VP6 gene; PEDV N, porcine epidemic diarrhea coronavirus nucleoprotein gene; PRRSV M, porcine reproductive and respiratory syndrome virus matrix protein gene; PSaV VPg, porcine sapovirus VPg; BCoV N, bovine coronavirus nucleocapsid protein gene; L32, 60S ribosomal protein gene; GAPDHs, glyceraldehyde 3-phosphate dehydrogenase genes; ERRα, estrogen-related receptor alpha; ERRγ, estrogen-related receptor gamma; SREBP-1a, sterol regulatory element-binding protein 1a; SREBP-1c, sterol regulatory element-binding protein 1c; SREBP-2, sterol regulatory element-binding protein 2.
